# Supplementary material for: Introducing GloRiSe – a global database on river sediment composition
Source: Copernicus journal article supplement (doi:10.5194/essd-13-3565-2021), 2021-07-29
Supplement: Supplementary file 1 [file essd-13-3565-2021-supplement.zip]

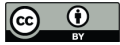

## *Supplement of*

# **Introducing GloRiSe – a global database on river sediment composition**

**Gerrit Müller et al.**

*Correspondence to:* Gerrit Müller (g.muller@uu.nl)

- [essd-13-3565-2021-supplement-title-page.pdf](#)
- [essd-2021-19\\_Supplements\\_new](#)
  - [AlSi\\_CEC\\_Tipper2021.mat](#)
  - [AveragePerBasin\\_MEOxides.csv](#)
  - [Documentation GloRiSe.docx](#)
  - [GlobalAverageME\\_Literature.xlsx](#)
  - [GlobalAverages\\_MEOxides.csv](#)
  - [RiverNames.csv](#)
  - [RiverNames.xlsx](#)
  - [SedimentDatabase.m](#)
  - [SedimentDatabase.mat](#)
  - [SedimentDatabase\\_ID.csv](#)
  - [SedimentDatabase\\_ID.xlsx](#)
  - [SedimentDatabase\\_Locations.csv](#)
  - [SedimentDatabase\\_Locations.xlsx](#)
  - [SedimentDatabase\\_ME\\_Nut.csv](#)
  - [SedimentDatabase\\_ME\\_Nut.xlsx](#)
  - [SedimentDatabase\\_Minerals.csv](#)
  - [SedimentDatabase\\_Minerals.xlsx](#)
  - [SedimentDatabase\\_TE.csv](#)
  - [SedimentDatabase\\_TE.xlsx](#)
  - [SedimentDatabase\\_ref.csv](#)
  - [SedimentDatabase\\_ref.xlsx](#)
  - [TSS\\_MF.mat](#)
  - [Tipper2021\\_CEC\\_AlSi.txt](#)
  - [UncertaintyFromTimeSeries.m](#)

The copyright of individual parts of the supplement might differ from the article licence.
